# Supplementary material
Source: publisher site journal article supplement (https://www.kjim.org/upload/media/kjim-2023-276-Supplementary-Fig-2.pdf)
Supplement: Supplementary file 1 [file kjim-2023-276-Supplementary-Fig-2.pdf]

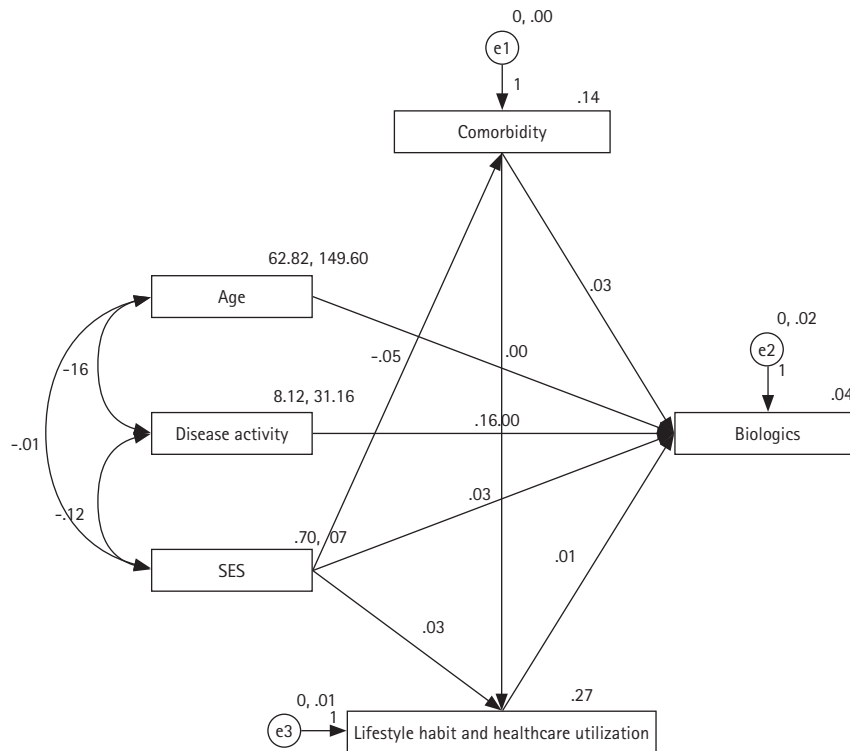

**Supplementary Figure 2.** Structural and measurement results of the structural equation modeling. SES, socioeconomic status.
